## **Adverse childhood experiences across Multiracial and monoracial groups with and without Indigenous ancestry**

### **Authors:**

1. Tracy Lam-Hine, DrPH, Stanford University School of Medicine, Division of Epidemiology & Population Health, Palo Alto, CA
2. Corinne A. Riddell, PhD, University of California Berkeley School of Public Health, Division of Biostatistics and Division of Epidemiology, Berkeley, CA
3. Patrick T. Bradshaw, PhD, University of California Berkeley School of Public Health, Division of Epidemiology, Berkeley, CA
4. Michael Omi, PhD, University of California Berkeley Department of Ethnic Studies, Berkeley, CA
5. Amani M. Allen, PhD, University of California Berkeley School of Public Health, Division of Community Health Sciences and Division of Epidemiology, Berkeley, CA

### **Corresponding Author:**

Tracy Lam-Hine Tel: 650-721-4944 | Email: [lamhine@stanford.edu](mailto:lamhine@stanford.edu)  
Stanford University School of Medicine, Department of Epidemiology & Population Health  
1701 Page Mill Road, Palo Alto, CA 94304

### **Abstract**

Adverse childhood experiences (ACEs) are linked to increased risk of a host of health outcomes in adulthood. Descriptive ACEs prevalence studies have previously identified that Multiracial people have the highest mean ACE score of any racial group, but do not offer explanations for these disparities. However, Multiracial people form one of the fastest-growing populations in the US, and the largest subgroup of Multiracial people is those that claim American Indian/Native American (AI/NA) ancestry. Mean ACE counts (scores) are also high among the AI/NA population, which may reflect impacts of land occupation and structural racism. This descriptive study uses data from the National Longitudinal Study of Adolescent to Adult Health (Add Health) to test the hypothesis that mean ACE scores and prevalence of ACE components are higher among Multiracial AI/NA participants than Multiracial non-AI/NA participants. Mean scores were highest among AI/NA (mean = 3.21, 95% CI: 2.54, 3.97), Multiracial AI/NA (2.95, 95% CI: 2.71, 3.18), Multiracial non-AI/NA (2.88, 95% CI: 2.57, 3.19), and Black (2.84, 95% CI: 2.65, 3.02) groups. Differences in mean ACE scores and prevalence of ACE components between the two Multiracial groups were all insignificant. Results from this study did not support our hypothesis, suggesting that the Multiracial population's high ACE scores are not driven primarily by those with AI/NA ancestry. Future studies should repeat this analysis in larger datasets and explore other determinants of high mean ACE scores among the Multiracial population.

## 1 **Background**

2 Adverse childhood experiences (ACEs) are traumatic events occurring during childhood known to be  
3 associated with the development of physical, psychological, and behavioral health problems later in life.<sup>1,2</sup>  
4 Strong dose-response effects of ACEs across multiple domains of health outcomes have been documented.  
5 One systematic review and meta-analysis found those reporting four or more ACEs were at higher risk for  
6 every studied health condition compared to those reporting no ACEs, with associations strongest for  
7 psychological and behavioral health outcomes and weaker for cancer and cardiometabolic outcomes.<sup>1</sup> Clinical  
8 guidance for ACEs risk assessments suggest that the risk of poor health tends to increase sharply at a score of  
9 three or four ACEs, depending on the outcome.<sup>3</sup> However, others have argued that ACE scores are more  
10 appropriately used to assess population-level differences in health risks, rather than prediction of a specific  
11 individual's future health.<sup>4</sup>

12 The initial ACEs study conducted by Kaiser Permanente between 1995-97 found widespread  
13 prevalence of ACEs in a relatively high socioeconomic status (SES), commercially-insured population in San  
14 Diego, CA.<sup>5</sup> The original ten ACE domains include: emotional, physical, and sexual abuse, emotional and  
15 physical neglect, parental separation or divorce, mother treated violently, household substance abuse, mental  
16 illness in household, and incarceration of a parent. The study substantiated the need for wider screening for  
17 traumatic childhood events beyond low SES populations and communities of color. However, disparities in  
18 the prevalence of ACEs by race, SES, sexual orientation, and other characteristics persist, with populations in  
19 socially-privileged positions consistently reporting fewer ACEs than marginalized groups.<sup>6</sup>

20 Discussions on the causes of racial disparities in ACEs are limited, which may reflect the reality that  
21 ACEs are most frequently used as an individual screening tool in medicine rather than as a measure of  
22 population health or health equity.<sup>7</sup> Additionally, ACEs are not a discrete condition, but a disparate set of  
23 traumatic events, which may also explain the paucity of literature on causes. The few studies that discuss  
24 racial disparities in ACEs suggest institutional and/or structural or systemic racism as potential causes.<sup>8-10</sup>  
25 Racism becomes institutionalized when social institutions — such as schools, employers, courts, etc. — adopt

26 and enforce policies or practices that are either overtly racist or lead to racial disparities in outcomes. Some  
27 examples include: state-sponsored occupation of Indigenous land, racially discriminatory lending practices,  
28 overpolicing and mass incarceration of people of color, and racialized treatment standards in healthcare  
29 delivery. Structural or systemic racism reflects the cumulative effects of racism across interacting institutions,  
30 enabling preservation of White privilege across space and time, and is considered a fundamental cause of  
31 health inequities.<sup>11-14</sup> Some forms of structural and institutional racism cause ACEs directly; for example,  
32 overpolicing and mass incarceration in Black and Brown communities results in large numbers of children of  
33 color with parents in prison.<sup>15</sup> Other forms may cause ACEs indirectly via material deprivation and the stress  
34 pathway across time. For example, the colonization and occupation of Indigenous lands and the subsequent  
35 forced resettlement of American Indian/Alaska Native (AI/NA) peoples into reservations with substandard  
36 educational and employment opportunities has impacted generations of AI/NA families. The stress on AI/NA  
37 families resulting from these structurally racist events predisposes their children to adverse developmental  
38 environments and experiences.<sup>16,17</sup>

39 Multiple studies have found that Multiracial — those identifying with more than one racial group —  
40 and AI/NA people consistently report the highest number of ACEs of all race/ethnicities.<sup>6,9,18-21</sup> However,  
41 small population sizes and inconsistency of racial data collection instruments mean that such population health  
42 analyses infrequently focus on Multiracial and AI/NA groups. As described above, there is a clear connection  
43 between colonialist land occupation, structural racism, and ACEs for the AI/NA population. However, most  
44 literature on structural racism discusses its impact on monoracial populations of color, making it unclear if  
45 structural racism is also responsible for elevated ACEs among the Multiracial populations.<sup>22</sup>

46 None of the studies identifying disparities in ACEs between monoracial and Multiracial populations  
47 discuss possible reasons for this difference. Given high rates of ACEs also reported in the AI/NA population  
48 and the disproportionate effects of structural racism and land occupation burdening this community, the  
49 Multiracial-monoracial disparity could be a result of the high numbers of Multiracial people claiming AI/NA  
50 ancestry. Disaggregation of Multiracial ancestry to investigate this theory is not possible in publicly-available

51 versions of large, nationally representative public health datasets, such as the National Health Interview  
52 Survey (NHIS), the Behavioral Risk Factor Surveillance System (BRFSS), and the National Survey of  
53 Children’s Health (NSCH), as the race variables provided collapse detailed multiple race responses into a  
54 single “Multiracial” category. Investigating disparities in ACEs in datasets that allow for detailed  
55 disaggregation of the Multiracial category could be a first step in better understanding the unique and urgent  
56 health risks facing this population.

57 To examine factors potentially associated with the disparity in exposure to ACEs between Multiracial  
58 and monoracial groups, in this study we test the hypothesis that Multiracial participants with AI/NA ancestry  
59 will report significantly higher mean ACE score and prevalence of ACE components than Multiracial  
60 participants without AI/NA ancestry. Support of this hypothesis would suggest that the Multiracial  
61 population’s high mean ACE score is driven by the large proportion of those with AI/NA ancestry, possibly  
62 reflecting the multigenerational consequences of colonialist land occupation affecting AI/NA communities.

63

## 64 **Methods**

### 65 *Data and analytic sample*

66 The National Longitudinal Study of Adolescent to Adult Health (Add Health) is a longitudinal,  
67 nationally representative study following over 20,000 individuals from grades 7-12 in 1994-95 through four  
68 waves of follow-up (1996, 2001-02, 2008-09, 2016-18).<sup>23</sup> Add Health is the largest nationally representative  
69 longitudinal study that allows study participants to select more than one racial category, making it an  
70 important source of research on Multiracial people.<sup>24,25</sup> Participants were recruited through a school-based  
71 cluster sample, sampled with unequal probability and without stratification. From a database of all 26,666  
72 high schools in the US, eighty public and private high schools and associated feeder middle schools were  
73 selected for size, type, grade range, setting, demographics, and geographic location. Within schools, specific  
74 racial/ethnic groups and students with disabilities were oversampled for population weighting. Students in  
75 grades 7-12 were sampled from school enrollment rosters and invited to complete an at-home interview during

76 Wave 1, with a total sample of 20,745 participants. Wave 1 included detailed questions about the adolescent's  
77 demographics and family background, social networks, home and school environments, and health behaviors.  
78 Wave 4 was conducted 14 years after Wave 1 in 2008-09, when the participants were in their late 20's and  
79 included measurements of the participants' metabolic and cardiovascular function. More details about the  
80 study design can be found in the Add Health study documentation.<sup>26</sup>

81

### 82 *Classification of race*

83 Add Health participants were asked to self-identify their race and ethnicity in Waves 1 and 3. In Wave  
84 1, participants were given five choices of racial categories: White, Black, American Indian/Native American  
85 (here reclassified as AI/NA), Asian, and Other, and were given the option to select multiple categories. In a  
86 separate question, participants were asked to indicate if they identified as Hispanic or Latino. At Wave 3, the  
87 "Other" option was removed, leaving respondents to select from four race options: White, Black, AI/NA, and  
88 Asian, still with the option to select multiple categories. Given the conceptual and methodological  
89 complexities of enumerating Multiracial people in quantitative data, we aimed to maximize the number of  
90 participants who classified as Multiracial. If a participant identified as Multiracial in both waves, we used their  
91 Wave 3 race. If a participant only identified as Multiracial in Wave 1 (but not in Wave 3), we used their Wave  
92 1 race. If a Multiracial participant selected "Other" in Wave 1, we used their Wave 1 racial combination.  
93 Otherwise, we used their Wave 3 race. We further split the Multiracial group into those reporting and not  
94 reporting AI/NA ancestry. The final racial categories were White, Black, Asian, AI/NA, Multiracial AI/NA,  
95 and Multiracial non-AI/NA. Post-hoc analysis led us to exclude the "Other alone" category due to the much  
96 smaller sample size relative to other groups (n = 24) and large confidence intervals, preventing meaningful  
97 interpretation of results.

98 Despite official attempts to separate race and Hispanic ethnicity, a majority of Hispanic/Latino people  
99 consider Latinidad to be a core part of their racial identity.<sup>27</sup> When Hispanic ethnicity is assessed separately  
100 from race, it becomes impossible to differentiate between monoracial or Multiracial Hispanic/Latino people.

101 Given these challenges, we align our methods with other studies<sup>28</sup> using Add Health data that have excluded  
102 participants that identified as Hispanic/Latino in Wave 1 or Wave 3.

103

#### 104 *Measurement of ACEs*

105 The original ACEs questionnaire included ten questions each covering a single domain of adverse  
106 experiences<sup>29</sup>: (1) emotional abuse, (2) physical abuse, (3) sexual abuse, (4) emotional neglect, (5) physical  
107 neglect, (6) parental separation or divorce, (7) mother treated violently, (8) household substance abuse, (9)  
108 mental illness in household, and (10) incarceration of household member. The original ACEs questionnaire  
109 was not administered in any Add Health surveys. Instead, researchers have used Add Health questions that  
110 approximate those asked in the original ACEs questionnaire.<sup>30-32</sup> We used a modified version of the widest set  
111 of questions available in Add Health data to construct ten variables approximating the components of the  
112 original ACE score, following the methods of Lee et al. and Otero.<sup>33,34</sup> We coded variables as binary and then  
113 summed them, with a minimum of zero and maximum of ten. Further details on the questions and variables  
114 used to construct the ACEs score in Add Health are available in Appendix A.

115

#### 116 *Statistical analyses*

117 We compared mean ACE scores (e.g.: the mean number of ACEs experienced) and unadjusted  
118 prevalence ratios of reporting each ACE component across each racial group. Because the Add Health design  
119 specifically oversampled certain groups based on demographic characteristics, we conducted a design-based  
120 analysis to address selection bias built into the sampling plan. We used complex survey weights to produce  
121 nationally-representative estimates and standard errors. We assessed differences in group mean scores and  
122 prevalence of individual ACE components using Tukey's honest significance test and by comparing 95%  
123 confidence intervals around mean score estimates.<sup>35,36</sup> We adjusted p-values using Bonferroni correction for  
124 multiple testing. All data and statistical analyses were performed in R using the "tidyverse" and "multcomp"  
125 packages.<sup>37-40</sup> Analysis of design effects with complex survey weights was implemented using the "survey"

126 package.<sup>41</sup> There were high levels of missingness in ACE components (frequencies presented in Appendix B);  
127 we thus performed Markov chain multiple imputation with 30 iterations and 4 chains using the “mi” and  
128 “mitools” packages.<sup>41,42</sup> Our imputation models specified all ACE components along with participant  
129 demographic information and hypothesized missingness predictor variables; results were pooled across 20  
130 imputed datasets.

131

## 132 **Results**

133 Unweighted counts and weighted joint distributions of participant sex, age, component ACE scores,  
134 and summary ACE scores by racial group are presented in Table 1.

135

136 <Table 1 here>

137

138 Total sample size was 12,372 after removing Hispanic/Latino participants, “Other alone” participants,  
139 and those missing complex survey weights for design-based analysis. Of these, 9,538 (94.2%) were  
140 monoracial and 834 (5.82%) were Multiracial. Monoracial White (n = 7,742, 74%) and Black (n = 2,915,  
141 17%) participants form the largest groups in the study sample. Among those identifying as Multiracial, 484  
142 (61%) indicated that they had some AI/NA ancestry, while 313 (29%) did not.

143

144 Despite not having the highest mean ACE score, non-AI/NA Multiracial participants had the highest  
145 prevalence of four different ACE components – more than any other group; 54% reported emotional abuse,  
146 37% physical abuse (equal to Asian and Multiracial AI/NA participants), 35% parental divorce or separation,  
147 and 12% mother treated violently (equal to Black participants). AI/NA and Multiracial AI/NA participants  
148 reported the highest prevalence each of three different components (AI/NA: 48% household substance, 31%  
149 household mental illness, 32% parental incarceration; Multiracial AI/NA: 37% physical abuse, 9.4% sexual  
150 abuse, 39% emotional neglect). Asian participants had the highest prevalence of physical neglect (53%) and  
similarly high levels of physical abuse to the Multiracial groups (37%). A similarly high proportion of Black

151 participants reported their mothers being treated violently to non-AI/NA Multiracial participants (12%).

152

153 < Table 2 here >

154

155 Among all racial groups, AI/NA (mean = 3.21, 95% CI: 2.54, 3.97), Multiracial AI/NA (2.95, 95%

156 CI: 2.71, 3.18), Multiracial non-AI/NA (2.88, 95% CI: 2.57, 3.19), and Black (2.84, 95% CI: 2.65, 3.02)

157 participants reported the highest mean ACE scores. Formal pairwise tests of difference in mean ACE score

158 between racial groups are presented in Table 2. Difference in mean scores were not significant between the

159 two Multiracial groups, nor in any pairwise comparisons between these groups and the AI/NA or Black

160 groups. The mean scores of these four groups were all significantly higher than those of the White or Asian

161 groups.

162

163 < Table 3 here >

164

165 Table 3 summarizes the statistically significant pairwise tests of ACE component score prevalence

166 ratios. For each of the ACE components except for emotional abuse and parental separation/divorce, at least

167 one group pairwise comparison was significant. Differences across racial groups were most pronounced for

168 household substance abuse, household mental illness, and parental incarceration. There were five significant

169 prevalence ratio comparisons each for the AI/NA, Multiracial AI/NA, and Black groups, and two for Asians.

170 White participants generally had the lowest risk of reporting ACE components. There were no significant

171 prevalence differences between the Multiracial AI/NA group and other groups across any of the ACE

172 components, including with the non-AI/NA Multiracial group.

173

## 174 **Discussion**

175 Our study tested the hypothesis that the mean ACE score and prevalence of ACE score components is

176 significantly higher among Multiracial participants with AI/NA ancestry than those without AI/NA ancestry.  
177 This hypothesis was definitively not supported by the summary ACE score data, as there were no significant  
178 differences between either the mean score or prevalence of components between the two Multiracial groups.

179 The lack of support for this hypothesis suggests that the elevated mean ACE score among Multiracial  
180 people may be due to something other than the legacy of structurally racist conditions, and that there may be  
181 experiences unique to the Multiracial population not reflected in our data. For example, studies show that in  
182 addition to traditional forms of racism, Multiracial people also experience *monoracism*, a system of racial  
183 subordination that privileges single-race identification.<sup>43,44</sup> Monoracism can be perpetuated by strangers, but  
184 evidence suggests that monoracism is also a feature of many interracial and Multiracial family structures.<sup>45-47</sup>  
185 It is plausible that certain forms of ACEs could be a result of monoracism, particularly forms of abuse or  
186 neglect. Another potential explanation is implicit and explicit racism that interracial couples cite as a source of  
187 relationship stress, which some have hypothesized to lead to elevated rates of intimate partner violence,  
188 divorce, and household dysfunction among interracial families.<sup>48-52</sup> However, it is important to acknowledge  
189 that the source of such social stressors are exogenous to interracial couples and not an inherent feature of  
190 interracial relationships. Monoracism has received limited attention in public health literature, but could help  
191 explain disparities in health between monoracial and Multiracial people.

192 This study had limitations. First, ACEs are defined as events occurring before the age of 18, but  
193 several ACEs domains can only be constructed using Add Health data with questions only asked during Wave  
194 1 when participants were ages 12-19. Therefore, observations for those ACE domains were censored for any  
195 participants that turned 18 after Wave 1. This is particularly problematic for the parental separation or divorce  
196 ACE, given how common divorce is in the US population. ACE scores may thus be biased downwards,  
197 especially for younger participants that had less under-18 observation time in Wave 1. Second, small sample  
198 sizes, especially for the AI/NA population, resulted in wide confidence intervals, making interpretation of  
199 study results challenging. Repeating this analysis in a larger dataset could reduce some of the random error  
200 due to Add Health's relatively small study size. Third, if there is indeed an association between mean ACE

201 score and race, the removal of the “Other” race option during Wave 3 of Add Health may have unintentionally  
202 introduced differential misclassification that could have affected results in unpredictable ways, particularly for  
203 Multiracial people who had previously endorsed the “Other” racial group. Finally, given that ACE scores of 4  
204 or greater are associated with increased risk across the greatest number of outcomes, an alternative approach  
205 to this study could be to dichotomize the ACE score into “low” (0-3) and “high” (4+) categories.

206 This study is the first to demonstrate that Multiracial people with and without AI/NA ancestry do not  
207 have significantly different ACE scores, suggesting the high mean ACE score among Multiracial people  
208 warrants deeper exploration. Future studies should replicate this analysis and test the our hypothesis in larger  
209 datasets where participants are directly asked the ACEs questionnaire, where individual exposure to aggregate  
210 measures of structural racism are more readily available, and where race is assessed more stably over time  
211 such as in the Behavioral Risk Factor Surveillance System and the National Survey of Children’s Health.  
212 Detailed race variables should be more frequently made available in public-use versions of datasets, which  
213 could help provide insights to make significant progress in understanding Multiracial-monoracial health  
214 disparities.

## References

1. Hughes K, Bellis MA, Hardcastle KA, et al. The effect of multiple adverse childhood experiences on health: a systematic review and meta-analysis. *Lancet Public Health*. 2017;2(8):e356-e366. doi:10.1016/S2468-2667(17)30118-4
2. Kalmakis KA, Chandler GE. Health consequences of adverse childhood experiences: A systematic review. *J Am Assoc Nurse Pract*. 2015;27(8):457-465. doi:10.1002/2327-6924.12215
3. ACEs Aware. ACE Screening Clinical Workflows, ACEs and Toxic Stress Risk Assessment Algorithm, and ACE-Associated Health Conditions: For Pediatrics and Adults. Published online April 2020. Accessed July 12, 2022. <https://www.acesaware.org/wp-content/uploads/2019/12/ACE-Clinical-Workflows-Algorithms-and-ACE-Associated-Health-Conditions.pdf>
4. Baldwin JR, Caspi A, Meehan AJ, et al. Population vs Individual Prediction of Poor Health From Results of Adverse Childhood Experiences Screening. *JAMA Pediatr*. 2021;175(4):385. doi:10.1001/jamapediatrics.2020.5602
5. Felitti VJ, Anda RF, Nordenberg D, et al. Relationship of Childhood Abuse and Household Dysfunction to Many of the Leading Causes of Death in Adults. *Am J Prev Med*. 1998;14(4):245-258. doi:10.1016/S0749-3797(98)00017-8
6. Giano Z, Wheeler DL, Hubach RD. The frequencies and disparities of adverse childhood experiences in the U.S. *BMC Public Health*. 2020;20(1):1327. doi:10.1186/s12889-020-09411-z
7. Anda RF, Porter LE, Brown DW. Inside the Adverse Childhood Experience Score: Strengths, Limitations, and Misapplications. *Am J Prev Med*. 2020;59(2):293-295. doi:10.1016/j.amepre.2020.01.009
8. Radford A, Toombs E, Zugic K, Boles K, Lund J, Mushquash CJ. Examining Adverse Childhood Experiences (ACEs) within Indigenous Populations: a Systematic Review. *J Child Adolesc Trauma*. Published online August 18, 2021. doi:10.1007/s40653-021-00393-7
9. Hall T, Rooks R, Kaufman C. Intersections of Adverse Childhood Experiences, Race and Ethnicity and Asthma Outcomes: Findings from the Behavioral Risk Factor Surveillance System. *Int J Environ Res Public Health*. 2020;17(21):8236. doi:10.3390/ijerph17218236
10. Centers for Disease Control and Prevention. *Preventing Adverse Childhood Experiences: Leveraging the Best Available Evidence*. National Center for Injury Prevention and Control, Centers for Disease Control and Prevention; 2019:40.
11. Williams DR, Mohammed SA. Racism and Health I: Pathways and Scientific Evidence. *Am Behav Sci*. 2013;57(8):1152-1173. doi:10.1177/0002764213487340
12. Jones C. Levels of racism: a theoretic framework and a gardener's tale. *Am J Public Health*. 2000;90(8):1212-1215. doi:10.2105/AJPH.90.8.1212
13. Braveman PA, Arkin E, Proctor D, Kauh T, Holm N. Systemic And Structural Racism: Definitions, Examples, Health Damages, And Approaches To Dismantling: Study examines definitions, examples, health damages, and dismantling systemic and structural racism. *Health Aff (Millwood)*. 2022;41(2):171-178. doi:10.1377/hlthaff.2021.01394

14. Phelan JC, Link BG. Is Racism a Fundamental Cause of Inequalities in Health? *Annu Rev Sociol.* 2015;41(1):311-330. doi:10.1146/annurev-soc-073014-112305
15. Bailey ZD, Feldman JM, Bassett MT. How Structural Racism Works — Racist Policies as a Root Cause of U.S. Racial Health Inequities. Malina D, ed. *N Engl J Med.* 2021;384(8):768-773. doi:10.1056/NEJMms2025396
16. Cross TL. Child Welfare In Indian Country: A Story Of Painful Removals. *Health Aff (Millwood).* 2014;33(12):2256-2259. doi:10.1377/hlthaff.2014.1158
17. Skewes MC, Blume AW. Understanding the link between racial trauma and substance use among American Indians. *Am Psychol.* 2019;74(1):88-100. doi:10.1037/amp0000331
18. Merrick MT, Ford DC, Ports KA, Guinn AS. Prevalence of Adverse Childhood Experiences From the 2011-2014 Behavioral Risk Factor Surveillance System in 23 States. *JAMA Pediatr.* 2018;172(11):1038. doi:10.1001/jamapediatrics.2018.2537
19. Weller BE, Conrad JK, Wilburn VG, Ramamonjiarivelo Z, Gladden J. Adverse childhood experiences and mental health conditions among multiracial adolescents. *Ethn Health.* Published online January 21, 2021:1-15. doi:10.1080/13557858.2020.1869187
20. Lam-Hine T, Riddell CA, Bradshaw PT, Omi M, Allen A. *Racial Differences in Associations Between Adverse Childhood Experiences and Physical, Mental, and Behavioral Health.* *Epidemiology*; 2023. doi:10.1101/2023.06.02.23290905
21. Lam-Hine T, Bradshaw PT, Allen A, Omi M, Riddell CA. *A Hypothetical Intervention to Reduce Inequities in Anxiety for Multiracial People: Simulating an Intervention on Childhood Adversity.* *Epidemiology*; 2023. doi:10.1101/2023.06.04.23290940
22. Grilo SA, Santelli JS, Nathanson CA, et al. Social and Structural Influences on Multiracial Identification and Health: a Public Health Mandate to Precisely Measure, Theorize, and Better Understand Multiracial Populations. *J Racial Ethn Health Disparities.* Published online February 22, 2022. doi:10.1007/s40615-022-01234-5
23. Harris KM, Udry JR. National Longitudinal Study of Adolescent to Adult Health (Add Health), 1994-2008 [Public Use]: Version 21. Published online 2008. doi:10.3886/ICPSR21600.V21
24. Charmaraman L, Woo M, Quach A, Erkut S. How have researchers studied multiracial populations? A content and methodological review of 20 years of research. *Cultur Divers Ethnic Minor Psychol.* 2014;20(3):336-352. doi:10.1037/a0035437
25. Shiao JL. When (In)Consistency Matters: Racial Identification and Specification. *Socius.* 2019;5:1-18. doi:10.1177/2378023119848268
26. Harris KM. The Add Health Study: Design and Accomplishments. Published online 2013. doi:10.17615/C6TW87
27. Pew Research Center. *Multiracial in America: Proud, Diverse and Growing in Numbers.* Pew Research Center; 2015:156.
28. Udry JR, Li RM, Hendrickson-Smith J. Health and Behavior Risks of Adolescents with Mixed-Race

- Identity. *Am J Public Health*. 2003;93(11):1865-1870. doi:10.2105/AJPH.93.11.1865
29. About the CDC-Kaiser ACE Study |Violence Prevention|Injury Center|CDC. Published November 3, 2021. Accessed January 10, 2022. <https://www.cdc.gov/violenceprevention/aces/about.html>
  30. Easterlin MC, Chung PJ, Leng M, Dudovitz R. Association of Team Sports Participation With Long-term Mental Health Outcomes Among Individuals Exposed to Adverse Childhood Experiences. *JAMA Pediatr*. 2019;173(7):681. doi:10.1001/jamapediatrics.2019.1212
  31. LeTendre ML, Reed MB. The Effect of Adverse Childhood Experience on Clinical Diagnosis of a Substance Use Disorder: Results of a Nationally Representative Study. *Subst Use Misuse*. 2017;52(6):689-697. doi:10.1080/10826084.2016.1253746
  32. Brumley LD, Jaffee SR, Brumley BP. Pathways from Childhood Adversity to Problem Behaviors in Young Adulthood: The Mediating Role of Adolescents' Future Expectations. *J Youth Adolesc*. 2017;46(1):1-14. doi:10.1007/s10964-016-0597-9
  33. Lee H, Kim Y, Terry J. Adverse childhood experiences (ACEs) on mental disorders in young adulthood: Latent classes and community violence exposure. *Prev Med*. 2020;134:106039. doi:10.1016/j.ypmed.2020.106039
  34. Otero C. Adverse Childhood Experiences (ACEs) and Timely Bachelor's Degree Attainment. *Soc Sci*. 2021;10(2):44. doi:10.3390/socsci10020044
  35. Abdi H, Williams LJ. Tukey's Honestly Significant Difference (HSD) Test. In: Neil Salkind, ed. *Encyclopedia of Research Design*. SAGE Publications, Inc.; 2010:5.
  36. Schenker N, Gentleman JF. On Judging the Significance of Differences by Examining the Overlap Between Confidence Intervals. *Am Stat*. 2001;55(3):182-186. doi:10.1198/000313001317097960
  37. R Core Team. R: A language and environment for statistical computing. Published online 2021. <https://www.R-project.org/>
  38. RStudio Team. RStudio: Integrated Development for R. Published online 2021. <http://www.rstudio.com/>
  39. Wickham H, Averick M, Bryan J, et al. Welcome to the Tidyverse. *J Open Source Softw*. 2019;4(43):1686. doi:10.21105/joss.01686
  40. Hothorn T, Bretz F, Westfall P. Simultaneous Inference in General Parametric Models. *Biom J*. 2008;50(3):346-363.
  41. Lumley T. Analysis of Complex Survey Samples. *J Stat Softw*. 2004;9(8). doi:10.18637/jss.v009.i08
  42. Su YS, Gelman A, Hill J, Yajima M. Multiple Imputation with Diagnostics ( **mi** ) in R: Opening Windows into the Black Box. *J Stat Softw*. 2011;45(2). doi:10.18637/jss.v045.i02
  43. Johnston MP, Nadal KL. Multiracial Microaggressions. In: Sue DW, ed. *Microaggressions and Marginality: Manifestation, Dynamics and Impact*. Wiley & Sons; 2010:22.
  44. Johnston-Guerrero MP, Tran VT, Combs L. Multiracial Identities and Monoracism: Examining the Influence of Oppression. *J Coll Stud Dev*. 2020;61(1):18-33. doi:10.1353/csd.2020.0001

45. Franco M, Carter S. Discrimination from family and substance use for multiracial individuals. *Addict Behav.* 2019;92:203-207. doi:10.1016/j.addbeh.2019.01.008
46. Atkin AL, Jackson KF. “Mom, You Don’t Get It”: A Critical Examination of Multiracial Emerging Adults’ Perceptions of Parental Support. *Emerg Adulthood.* 2021;9(4):305-319. doi:10.1177/2167696820914091
47. Atkin AL, Jackson KF, White RMB, Tran AGTT. A qualitative examination of familial racial-ethnic socialization experiences among multiracial American emerging adults. *J Fam Psychol.* 2022;36(2):179-190. doi:10.1037/fam0000918
48. Skinner AL, Hudac CM. “Yuck, you disgust me!” Affective bias against interracial couples. *J Exp Soc Psychol.* 2017;68:68-77. doi:10.1016/j.jesp.2016.05.008
49. Rosenthal L, Starks TJ. Relationship stigma and relationship outcomes in interracial and same-sex relationships: Examination of sources and buffers. *J Fam Psychol.* 2015;29(6):818-830. doi:10.1037/fam0000116
50. Martin BA, Cui M, Ueno K, Fincham FD. Intimate Partner Violence in Interracial and Monoracial Couples: Intimate Partner Violence in Interracial Couples. *Fam Relat.* 2013;62(1):202-211. doi:10.1111/j.1741-3729.2012.00747.x
51. Bratter JL, Eschbach K. ‘What about the couple?’ Interracial marriage and psychological distress. *Soc Sci Res.* 2006;35(4):1025-1047. doi:10.1016/j.ssresearch.2005.09.001
52. Qian Z, Lichter DT. Social Boundaries and Marital Assimilation: Interpreting Trends in Racial and Ethnic Intermarriage. *Am Sociol Rev.* 2007;72(1):68-94. doi:10.1177/000312240707200104

**Table 1.** Participant characteristics and ACE components<sup>a</sup> stratified by race, Add Health 1994-2008

| <b>Characteristic</b>          | <b>Overall</b> | <b>White</b> | <b>Black</b> | <b>Asian</b> | <b>AI/NA</b> | <b>M. AI/NA</b> | <b>M. non-AI/NA</b> |
|--------------------------------|----------------|--------------|--------------|--------------|--------------|-----------------|---------------------|
|                                | 12,372 (100%)  | 7,742 (74%)  | 2,915 (17%)  | 805 (3.2%)   | 76 (0.6%)    | 484 (3.9%)      | 313 (2.5%)          |
| Male sex                       | 5,778 (51%)    | 3,672 (51%)  | 1,267 (50%)  | 418 (53%)    | 41 (64%)     | 230 (50%)       | 150 (50%)           |
| Age                            | 29.0           | 28.9         | 29.2         | 29.2         | 28.8         | 28.8            | 28.8                |
| Emotional abuse                | 5,779 (47%)    | 3,571 (45%)  | 1,329 (51%)  | 406 (51%)    | 33 (45%)     | 268 (52%)       | 172 (54%)           |
| Physical abuse                 | 2,825 (28%)    | 1,674 (26%)  | 603 (28%)    | 264 (37%)    | 22 (36%)     | 164 (37%)       | 98 (37%)            |
| Sexual abuse                   | 461 (5.9%)     | 246 (5.2%)   | 133 (8.2%)   | 37 (5.8%)    | 4 (8.4%)     | 34 (9.4%)       | 7 (4.6%)            |
| Emotional neglect              | 3,715 (30%)    | 2,209 (28%)  | 903 (32%)    | 281 (35%)    | 27 (36%)     | 186 (39%)       | 109 (33%)           |
| Physical neglect               | 4,097 (43%)    | 2,453 (42%)  | 954 (47%)    | 330 (53%)    | 29 (46%)     | 212 (48%)       | 119 (47%)           |
| Parental divorce or separation | 3,019 (30%)    | 1,922 (30%)  | 774 (34%)    | 64 (14%)     | 17 (34%)     | 149 (31%)       | 93 (35%)            |
| Mother treated violently       | 231 (6.4%)     | 148 (5.2%)   | 61 (12.4%)   | 6 (3.0%)     | 0 (3.6%)     | 6 (3.6%)        | 10 (12%)            |
| Household substance abuse      | 1,949 (22%)    | 1,302 (21%)  | 408 (23%)    | 49 (13%)     | 23 (48%)     | 118 (32%)       | 49 (26%)            |
| Household mental illness       | 1,187 (16%)    | 706 (14%)    | 313 (24%)    | 70 (14%)     | 14 (31%)     | 54 (18%)        | 30 (14%)            |
| Parental incarceration         | 2,206 (19%)    | 1,212 (16%)  | 726 (29%)    | 48 (6.3%)    | 24 (32%)     | 124 (25%)       | 72 (26%)            |
| Mean ACE score                 | 2.46           | 2.35         | 2.84         | 2.32         | 3.21         | 2.95            | 2.84                |

Abbreviations: ACE = adverse childhood experience; M. = Multiracial; AI/NA = American Indian/Native American

<sup>a</sup> Counts are crude non-missing values; proportions (for categorical variables) and means (for continuous) are pooled estimates from 20 survey-weighted imputations

**Table 2.** Summary of group mean ACE scores and Tukey’s honest significance pairwise tests of group difference in mean ACE scores, Add Health 1994-2008

| <b>Reference</b> | <b>Mean ACE score (95% CI)</b> | <b>Comparison</b> | <b>Mean Diff (95% CI)</b> | <b>p-value</b> |
|------------------|--------------------------------|-------------------|---------------------------|----------------|
| White            | 2.35 (2.26, 2.44)              | Black             | 0.33 (0.25, 0.42)         | < 0.001        |
|                  |                                | Asian             | -0.07 (-0.21, 0.07)       | 0.325          |
|                  |                                | AI/NA             | 0.43 (0.22, 0.64)         | < 0.001        |
|                  |                                | M. AI/NA          | 0.62 (0.46, 0.78)         | < 0.001        |
|                  |                                | M. non-AI/NA      | 0.53 (0.33, 0.73)         | < 0.001        |
| Black            | 2.84 (2.65, 3.02)              | Asian             | -0.40 (-0.56, -0.25)      | < 0.001        |
|                  |                                | AI/NA             | 0.10 (-0.12, 0.32)        | 0.390          |
|                  |                                | M. AI/NA          | 0.29 (0.11, 0.46)         | 0.001          |
|                  |                                | M. non-AI/NA      | 0.18 (-0.01, 0.40)        | 0.062          |
| Asian            | 2.32 (2.09, 2.54)              | AI/NA             | 0.50 (0.25, 0.76)         | < 0.001        |
|                  |                                | M. AI/NA          | 0.69 (0.49, 0.89)         | < 0.001        |
|                  |                                | M. non-AI/NA      | 0.60 (0.36, 0.84)         | < 0.001        |
| AI/NA            | 3.21 (2.54, 3.97)              | M. AI/NA          | 0.19 (-0.08, 0.46)        | 0.164          |
|                  |                                | M. non-AI/NA      | -0.10 (-0.18, 0.38)       | 0.486          |
| M. AI/NA         | 2.95 (2.71, 3.18)              | M. non-AI/NA      | -0.09 (-0.33, 0.15)       | 0.470          |
| M. non-AI/NA     | 2.88 (2.57, 3.19)              |                   |                           |                |

Abbreviations: M. = Multiracial, AI/NA = American Indian/Native American

**Table 3.** Summary of significant Bonferroni-corrected Tukey’s honest significance tests of ACE component prevalence ratios, Add Health 1994-2008

| <b>ACE Component</b>      | <b>Comparison</b> | <b>PR (95% CI)</b> | <b>p-value</b> |
|---------------------------|-------------------|--------------------|----------------|
| Physical abuse            | Asian-White       | 1.45 (1.18, 1.77)  | < 0.001        |
|                           | M. AI/NA-White    | 1.42 (1.19, 1.69)  | < 0.001        |
| Sexual abuse              | Black-White       | 1.64 (1.27, 2.13)  | < 0.001        |
| Emotional neglect         | M. AI/NA-White    | 1.37 (1.18, 1.59)  | < 0.001        |
| Physical neglect          | Asian-White       | 1.35 (1.16, 1.56)  | < 0.001        |
| Mother treated violently  | Black-White       | 2.33 (1.47, 3.69)  | < 0.001        |
| Household substance abuse | AI/NA-White       | 2.59 (1.79, 3.75)  | < 0.001        |
|                           | M. AI/NA-White    | 1.46 (1.18, 1.79)  | < 0.001        |
|                           | AI/NA-Black       | 2.31 (1.58, 3.37)  | < 0.001        |
|                           | AI/NA-Asian       | 5.33 (2.84, 9.99)  | < 0.001        |
|                           | M. AI/NA-Asian    | 3.00 (1.69, 5.31)  | < 0.001        |
| Household mental illness  | Black-White       | 2.03 (1.71, 2.41)  | < 0.001        |
|                           | AI/NA-White       | 3.65 (2.22, 6.02)  | < 0.001        |
|                           | AI/NA-Asian       | 3.96 (2.10, 7.48)  | < 0.001        |
| Parental incarceration    | Black-White       | 1.83 (1.56, 2.15)  | < 0.001        |
|                           | M. AI/NA-White    | 1.54 (1.23, 1.93)  | < 0.001        |
|                           | Black-Asian       | 4.54 (1.96, 11.1)  | < 0.001        |

Abbreviations: PR = Prevalence Ratio M. = Multiracial; AI/NA = American Indian/Native American
